# Supplementary material
Source: PubMed Central journal article supplement (PMC2518413)
Supplement: 00038.2008_1.pdf [file 00038.2008_1.pdf]

### Derivation of equation used to calculate cytosolic cAMP concentration.

The absolute maximal FRET response observed *in vitro* ( $F_{ABS}$ ) and the maximal FRET response observed in the intact cell ( $F_{MAX}$ ) are described by Eq. 1 and Eq. 2, respectively:

$$F_{ABS} = \frac{R_{MAX} - R_{0 \text{ in vitro}}}{R_{0 \text{ in vitro}}} \quad (\text{Eq. 1})$$

$$F_{MAX} = \frac{R_{MAX} - R_{0 \text{ cell}}}{R_{0 \text{ cell}}} \quad (\text{Eq. 2})$$

where  $R_{MAX}$  = maximum CFP/YFP fluorescence ratio;  $R_{0 \text{ in vitro}}$  = minimum CFP/YFP fluorescence ratio *in vitro*; and  $R_{0 \text{ cell}}$  = minimum CFP/YFP fluorescence ratio in the intact cell.

Based on Eq.1 and Eq. 2, and assuming that  $R_{MAX}$  is identical *in vitro* and in the intact cell, we can derive Equation 3:

$$F_{ABS} * R_{0 \text{ in vitro}} + R_{0 \text{ in vitro}} = F_{MAX} * R_{0 \text{ cell}} + R_{0 \text{ cell}} \quad \rightarrow$$

$$R_{0 \text{ cell}} = \left( \frac{F_{ABS} + 1}{F_{MAX} + 1} \right) * R_{0 \text{ in vitro}} \quad (\text{Eq. 3})$$

Furthermore, the FRET response observed under any given set of experimental conditions ( $F$ ) can be described by Equation 4:

$$F = \frac{R_{\text{cell}} - R_{0 \text{ cell}}}{R_{0 \text{ cell}}} \quad \rightarrow$$

$$R_{\text{cell}} = R_{0 \text{ cell}} * (F + 1) \quad (\text{Eq. 4})$$

where  $R_{\text{cell}}$  = the CFP/YFP fluorescence ratio in the intact cell.

Based on Eq. 3 and Eq. 4, we can derive Eq. 5, which describes the *equivalent* FRET response *in vitro* ( $F_{\text{eq in vitro}}$ ):

$$F_{\text{eq in vitro}} = \frac{R_{\text{cell}} - R_{0 \text{ in vitro}}}{R_{0 \text{ in vitro}}} = \frac{R_{0 \text{ cell}} * (F + 1) - R_{0 \text{ in vitro}}}{R_{0 \text{ in vitro}}} \quad \rightarrow$$

$$F_{\text{eq in vitro}} = \frac{\left[ \left( \frac{F_{ABS} + 1}{F_{MAX} + 1} \right) * R_{0 \text{ in vitro}} \right] * (F + 1) - R_{0 \text{ in vitro}}}{R_{0 \text{ in vitro}}} \quad \rightarrow$$

$$F_{eq\ in\ vitro} = \left( \frac{F_{ABS} + 1}{F_{MAX} + 1} \right) * (F + 1) - 1 \quad (\text{Eq. 5})$$

The Hill equation describing the *in vitro* FRET response of the probe to different cAMP concentrations is:

$$F_{eq\ in\ vitro} = \frac{F_{ABS} * [cAMP]^n}{EC_{50}^n + [cAMP]^n} = \frac{F_{ABS}}{1 + \left( \frac{EC_{50}}{[cAMP]} \right)^n} \quad (\text{Eq. 6})$$

where  $EC_{50}$  = the concentration of cAMP that produces half-maximal activation of the probe and  $n$  is the Hill coefficient.

Based on Eq. 5 and Eq. 6 we can derive Eq. 7 to calculate the concentration of cAMP that produces a given FRET response in an intact cell (F):

$$[cAMP] = EC_{50} * \left( \frac{F_{eq\ in\ vitro}}{F_{ABS} - F_{eq\ in\ vitro}} \right)^{1/n} \quad \rightarrow$$

$$[cAMP] = EC_{50} * \left( \frac{(F_{ABS} + 1) * (F + 1) - F_{MAX} - 1}{F_{ABS} * (F_{MAX} + 1) - [(F_{ABS} + 1) * (F + 1) - F_{MAX} - 1]} \right)^{1/n} \quad \rightarrow$$

$$[cAMP] = EC_{50} * \left( \frac{F_{ABS} * (F + 1) + F - F_{MAX}}{F_{ABS} * (F_{MAX} - F) - F + F_{MAX}} \right)^{1/n} \quad (\text{Eq. 7})$$

**Supplement Table 1: MODEL PARAMETERS**

| <i><b>Parameter</b></i>       | <i><b>Value</b></i> | <i><b>Units</b></i> | <i><b>Description</b></i>                                     |
|-------------------------------|---------------------|---------------------|---------------------------------------------------------------|
| $R_{\beta_1\text{TotalCav}}$  | 0.633               | $\mu\text{M}$       | concentration of $\beta_1\text{R}$ in Cav compartment         |
| $R_{\beta_1\text{TotalEcav}}$ | 1.098               | $\mu\text{M}$       | concentration of $\beta_1\text{R}$ in Ecav compartment        |
| $R_{\beta_1\text{TotalCyt}}$  | 0.603               | $\mu\text{M}$       | concentration of $\beta_1\text{R}$ in Cyt compartment         |
| $K_H$                         | 0.062               | $\mu\text{M}$       | high affinity binding constant between ligand and receptor    |
| $K_L$                         | 0.567               | $\mu\text{M}$       | low affinity binding constant between ligand and receptor     |
| $K_C$                         | 8.809               | $\mu\text{M}$       | affinity binding constant between free receptor and G protein |
| $R_{M_2\text{TotalCav}}$      | 0.506               | $\mu\text{M}$       | concentration of $M_2\text{R}$ in Cav compartment             |
| $R_{M_2\text{TotalEcav}}$     | 0.506               | $\mu\text{M}$       | concentration of $M_2\text{R}$ in Ecav compartment            |
| $R_{M_2\text{TotalCyt}}$      | 0.301               | $\mu\text{M}$       | concentration of $M_2\text{R}$ in Cyt compartment             |
| $K_H$                         | 0.16                | $\mu\text{M}$       | high affinity binding constant between ligand and receptor    |
| $K_L$                         | 11                  | $\mu\text{M}$       | low affinity binding constant between ligand and receptor     |
| $K_C$                         | 30                  | $\mu\text{M}$       | affinity binding constant between free receptor and G protein |

|                  |                   |                     |                                                                        |
|------------------|-------------------|---------------------|------------------------------------------------------------------------|
| $G_{sTotalCav}$  | 10                | $\mu M$             | concentration of $G_s$ protein in Cav compartment                      |
| $G_{sTotalEcav}$ | 10                | $\mu M$             | concentration of $G_s$ protein in Ecav compartment                     |
| $G_{sTotalCyt}$  | 10                | $\mu M$             | concentration of $G_s$ protein in Cyt compartment                      |
| $G_{iTotalCav}$  | 20                | $\mu M$             | concentration of $G_i$ protein in Cav compartment                      |
| $G_{iTotalEcav}$ | 1                 | $\mu M$             | concentration of $G_i$ protein in Ecav compartment                     |
| $G_{iTotalCyt}$  | 10                | $\mu M$             | concentration of $G_i$ protein in Cyt compartment                      |
| $k_{act1Gi}$     | 0.1               | $s^{-1}$            | activation rate constant for $RG_i$ complexes                          |
| $k_{act2Gi}$     | 5                 | $s^{-1}$            | activation rate constant for $LRG_i$ complexes                         |
| $k_{act1Gs}$     | 0.1               | $s^{-1}$            | activation rate constant for $RG_s$ complexes                          |
| $k_{act2Gs}$     | 5                 | $s^{-1}$            | activation rate constant for $LRG_s$ complexes                         |
| $k_{hydrGi}$     | 0.8               | $s^{-1}$            | hydrolyzation rate constant of $G_{i\alpha-GTP}$                       |
| $k_{reasGi}$     | $1.21 \cdot 10^3$ | $s^{-1} \mu M^{-1}$ | reassociation rate constant of $G_{i\alpha-GDP}$ and $G_{\beta\gamma}$ |
| $k_{hydrGs}$     | 0.8               | $s^{-1}$            | hydrolyzation rate constant of $G_{s\alpha-GTP}$                       |

|                 |                   |                                                                 |                                                                       |
|-----------------|-------------------|-----------------------------------------------------------------|-----------------------------------------------------------------------|
| $k_{reasGs}$    | $1.21 \cdot 10^3$ | $s^{-1} \mu M^{-1}$                                             | reassociation rate constant of $G_{\alpha-GDP}$ and $G_{\beta\gamma}$ |
| $AC_{5/6-Cav}$  | 3.379             | $\mu M$                                                         | concentration of Cav $AC_{5/6}$                                       |
| $AC_{5/6-Cyt}$  | 0.126             | $\mu M$                                                         | concentration of Cyt $AC_{5/6}$                                       |
| ATP             | $5 \cdot 10^3$    | $\mu M$                                                         | concentration of ATP (constant)                                       |
| $K_{mATP}$      | 315               | $\mu M$                                                         | $AC_{5/6} K_m$ for ATP                                                |
| $AF_{5/6}$      | 500               | $\frac{\text{mg purified protein}}{\text{mg membrane protein}}$ | amplification factor for $AC_{5/6}$                                   |
| $MW_{AC5/6}$    | 130               | Kda                                                             | molecular weight of $AC_{5/6}$                                        |
| $AC_{4/7-Ecav}$ | 0.200             | $\mu M$                                                         | concentration of Ecav $AC_{4/7}$                                      |
| $AC_{4/7-Cyt}$  | 0.006             | $\mu M$                                                         | concentration of Cyt $AC_{4/7}$                                       |
| $AF_{4/7}$      | 130               | $\frac{\text{mg purified protein}}{\text{mg membrane protein}}$ | amplification factor for $AC_{4/7}$                                   |
| $MW_{AC4/7}$    | 130               | KDa                                                             | molecular weight of $AC_{4/7}$                                        |
| $K_{mPDE2}$     | 50                | $\mu M$                                                         | PDE2 $K_m$ for cAMP                                                   |
| $K_{mPDE3}$     | 0.08              | $\mu M$                                                         | PDE3 $K_m$ for cAMP                                                   |
| $K_{mPDE4}$     | 2.2               | $\mu M$                                                         | PDE4 $K_m$ for cAMP                                                   |
| $k_{PDE2}$      | 20                | $s^{-1}$                                                        | rate constant for PDE2                                                |
| $k_{PDE3}$      | 1.25              | $s^{-1}$                                                        | rate constant for PDE3                                                |
| $k_{PDE4}$      | 2.5               | $s^{-1}$                                                        | rate constant for PDE4                                                |

|                |                  |                          |                                             |
|----------------|------------------|--------------------------|---------------------------------------------|
| $PDE_{2Cav}$   | 4.5              | $\mu M$                  | PDE2 concentration in Cav compartment       |
| $PDE_{2Ecav}$  | 0.002            | $\mu M$                  | PDE2 concentration in Ecav compartment      |
| $PDE_{2Cyt}$   | 0.068            | $\mu M$                  | PDE2 concentration in Cyt compartment       |
| $PDE_{3Cav}$   | 5.6              | $\mu M$                  | PDE3 concentration in Cav compartment       |
| $PDE_{3Cyt}$   | 0.113            | $\mu M$                  | PDE3 concentration in Cyt compartment       |
| $PDE_{4Cav}$   | 2.0              | $\mu M$                  | PDE4 concentration in Cav compartment       |
| $PDE_{4Ecav}$  | 0.01             | $\mu M$                  | PDE4 concentration in Ecav compartment      |
| $PDE_{4Cyt}$   | 0.027            | $\mu M$                  | PDE4 concentration in Cyt compartment       |
| $J_{Cav/Ecav}$ | $5 * 10^{-15}$   | Liters * s <sup>-1</sup> | flux rate between Cav and Ecav compartments |
| $J_{Cav/Cyt}$  | $7.5 * 10^{-14}$ | Liters * s <sup>-1</sup> | flux rate between Cav and Cyt compartments  |
| $J_{Ecav/Cyt}$ | $0.9 * 10^{-14}$ | Liters * s <sup>-1</sup> | flux rate between Ecav and Cyt compartments |

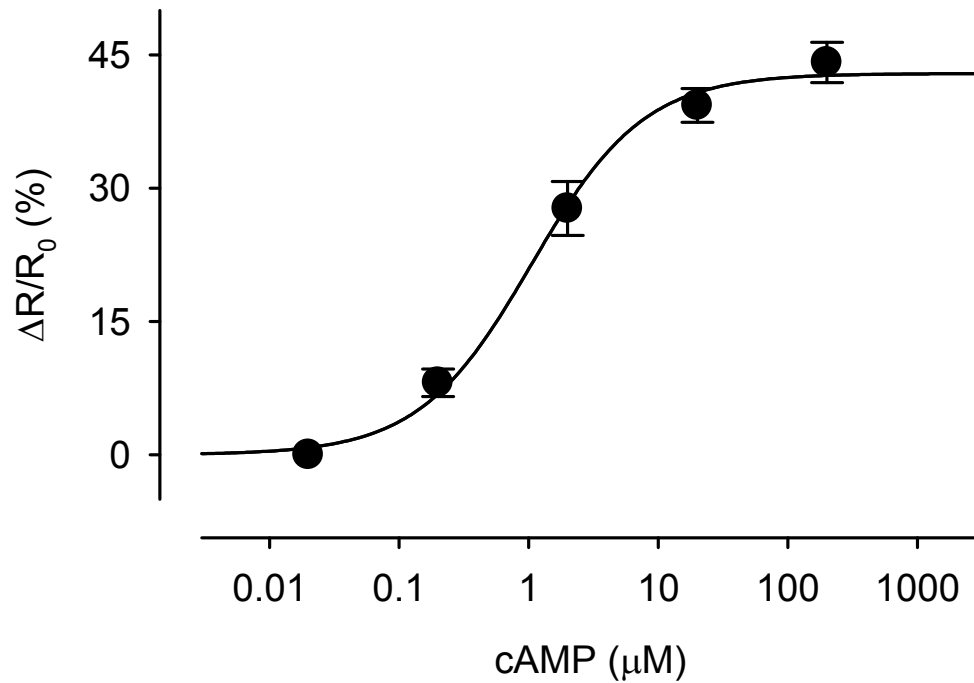

**Supplement Figure 1.** Concentration dependence of the cAMP-dependent change in Epac2-camps CFP/YFP emission intensity ratio ( $\Delta R/R_0$ ) observed *in vitro* (see *Methods*). Parameters of fit to data points:  $EC_{50}$ , 1.1  $\mu\text{M}$ , Hill coefficient, 1, maximum FRET response 43%.
